# Supplementary material for: Covert shift of attention modulates the value encoding in the orbitofrontal cortex
Source: eLife journal article supplement (doi:10.7554/elife.31507), 2018-03-13
Supplement: supp [file elife-31507-supp-v1.zip]

Archive with 18 entries (18 files):
- elife_poa_e31507_Figure_3_figure_supplement_1.pdf
- elife_poa_e31507_Supplementary_File_1.docx
- elife_poa_e31507_Figure_5_figure_supplement_3.pdf
- elife_poa_e31507_Figure_2_figure_supplement_1.pdf
- elife_poa_e31507_Figure_2_figure_supplement_3.pdf
- elife_poa_e31507_Figure_4_figure_supplement_7.pdf
- elife_poa_e31507_Figure_4_figure_supplement_6.pdf
- elife_poa_e31507_Figure_4_figure_supplement_5.pdf
- elife_poa_e31507_Figure_4_figure_supplement_3.pdf
- elife_poa_e31507_Figure_5_figure_supplement_2.pdf
- elife_poa_e31507_Figure_2_figure_supplement_2.pdf
- elife_poa_e31507_Figure_4_figure_supplement_4.pdf
- elife_poa_e31507_Transparent_Reporting_File.docx
- elife_poa_e31507_Figure_4_figure_supplement_2.pdf
- elife_poa_e31507_Figure_5_figure_supplement_4.pdf
- elife_poa_e31507_Figure_4_figure_supplement_1.pdf
- elife_poa_e31507_Figure_4_figure_supplement_8.pdf
- elife_poa_e31507_Figure_5_figure_supplement_1.pdf
