# Supplementary figures and images for: Covert shift of attention modulates the value encoding in the orbitofrontal cortex
Source: eLife journal article supplement (doi:10.7554/elife.31507), 2018-03-13

Figure 3 supplement 1

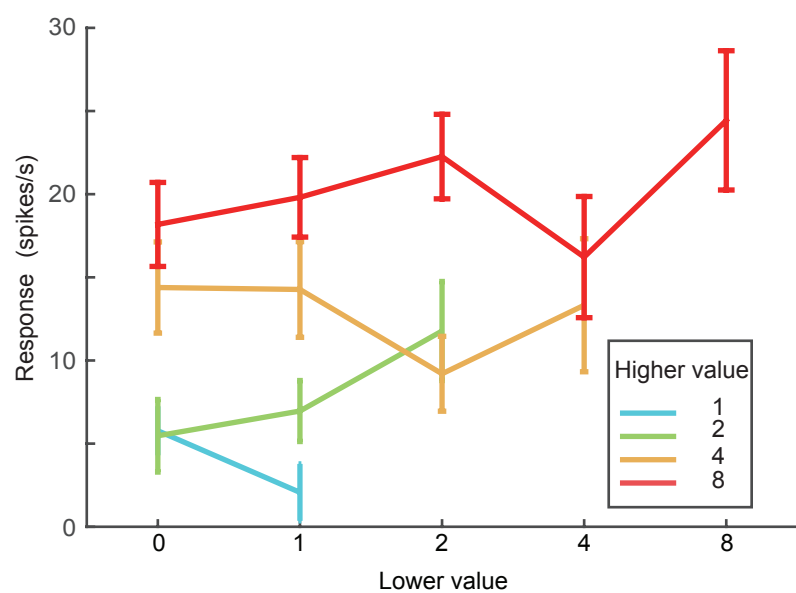

Supplement: supp [file elife-31507-supp-v1.zip › elife_poa_e31507_Figure_3_figure_supplement_1.pdf]

**A.**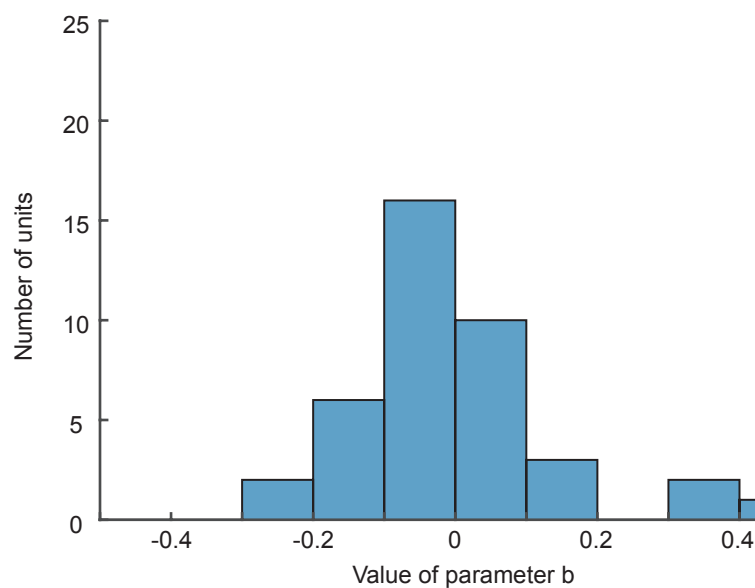**B.**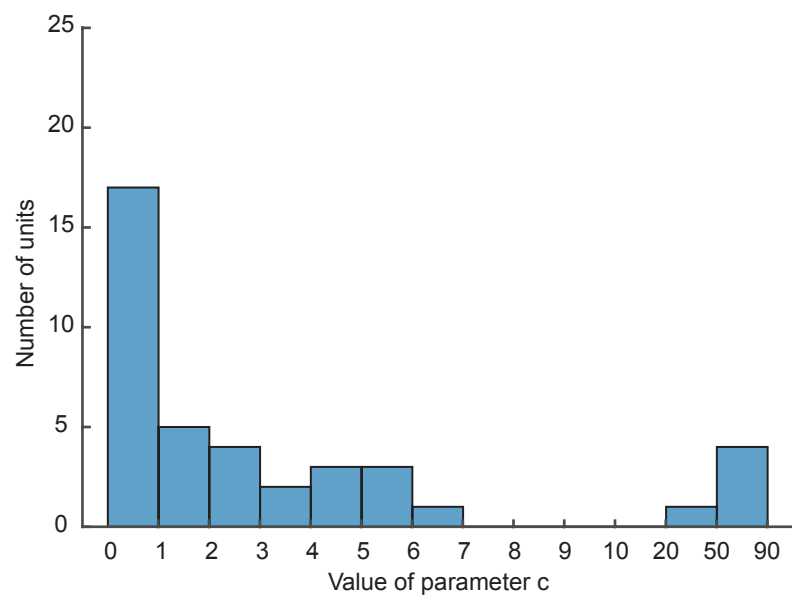**C.**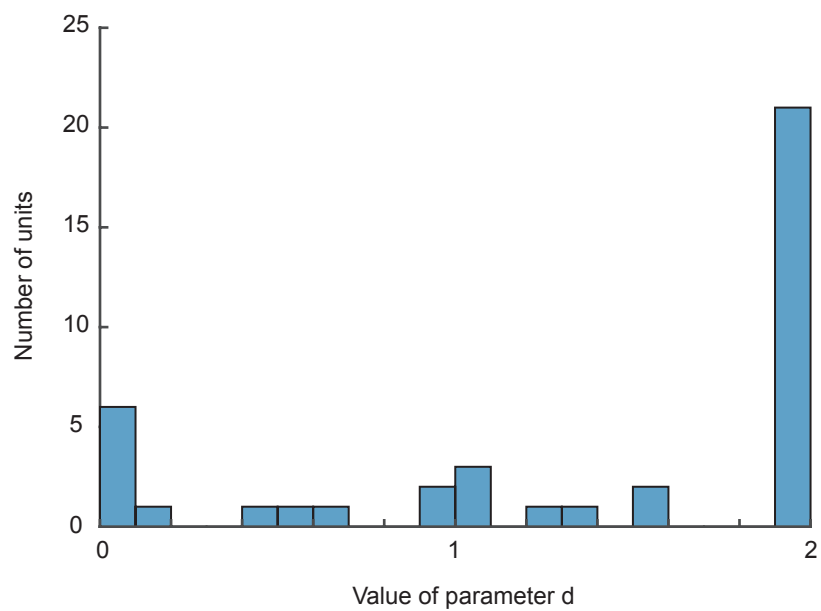

Supplement: supp [file elife-31507-supp-v1.zip › elife_poa_e31507_Figure_5_figure_supplement_3.pdf]

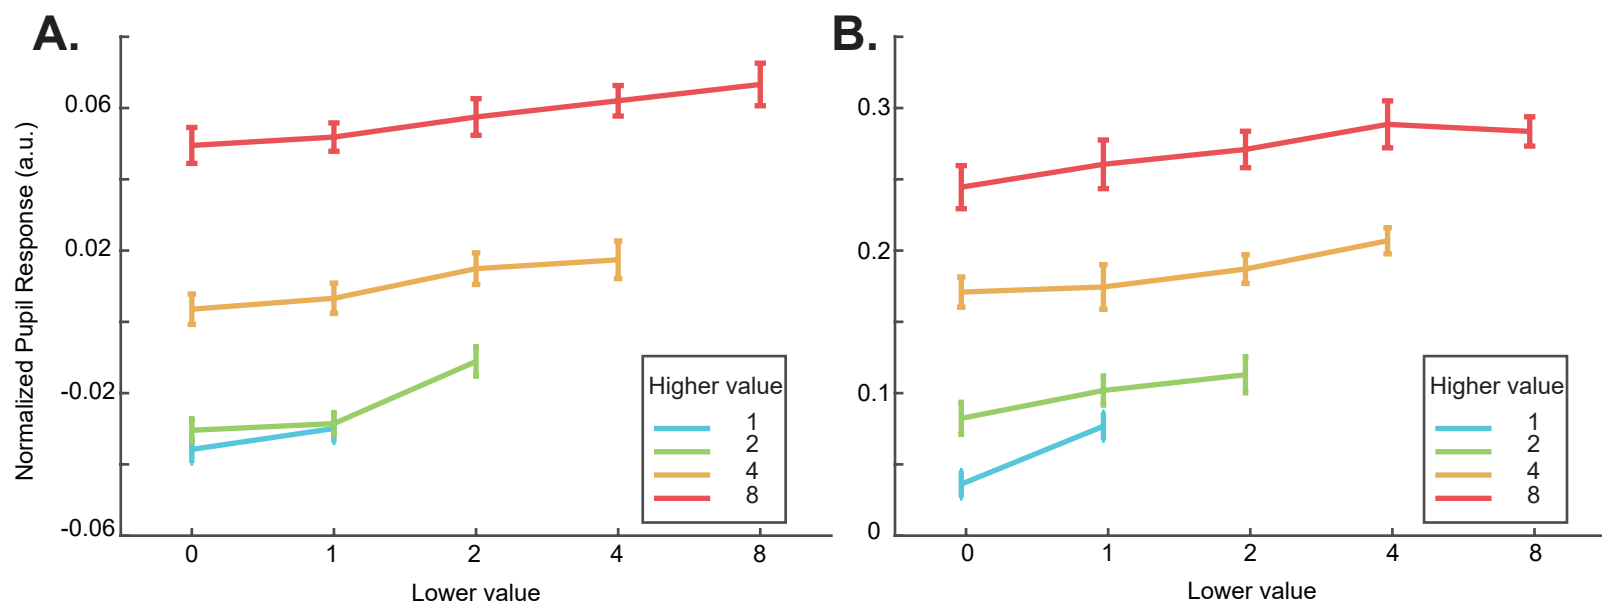

Supplement: supp [file elife-31507-supp-v1.zip › elife_poa_e31507_Figure_2_figure_supplement_1.pdf]

Figure 2 supplement 3

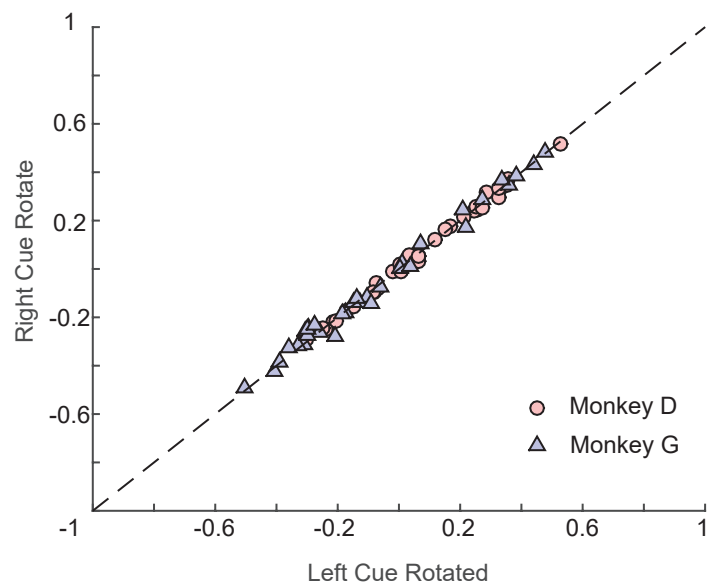

Supplement: supp [file elife-31507-supp-v1.zip › elife_poa_e31507_Figure_2_figure_supplement_3.pdf]

**A**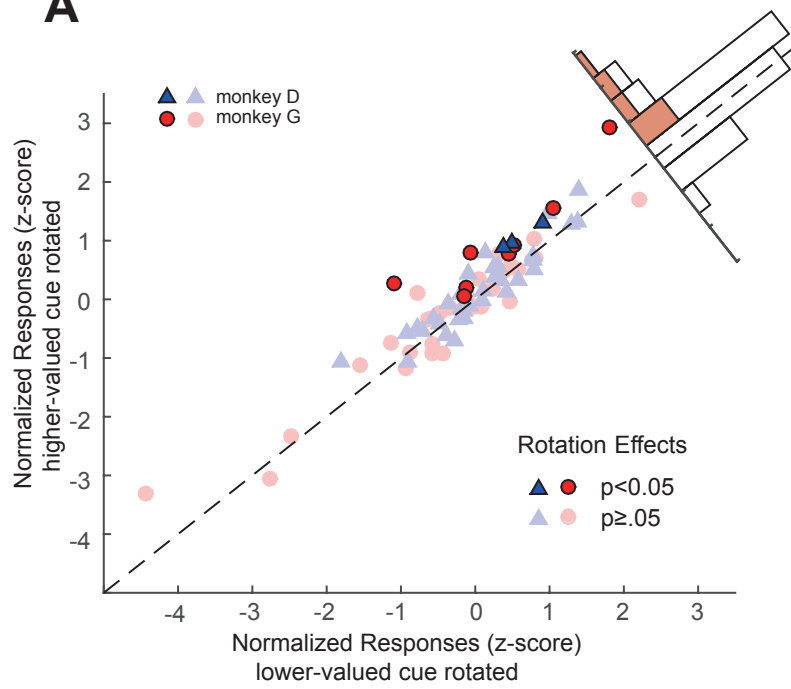**B**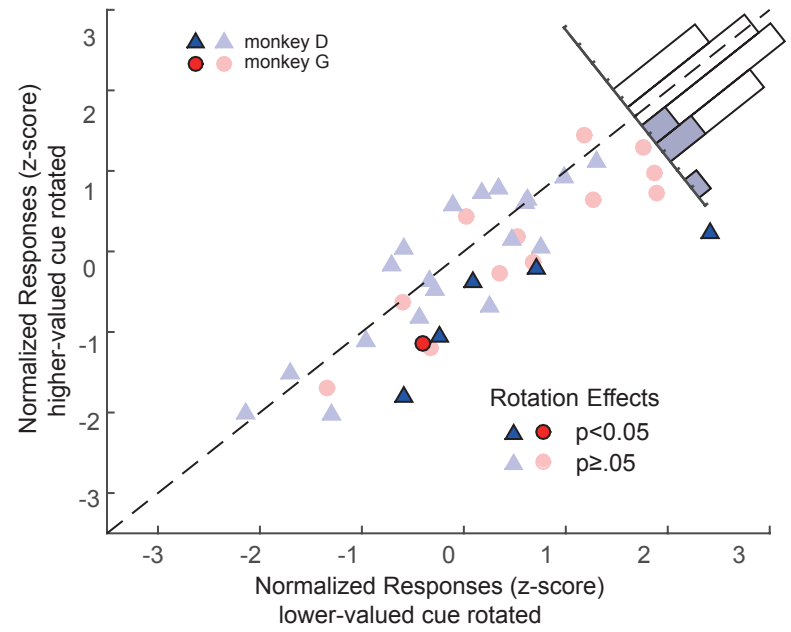

Supplement: supp [file elife-31507-supp-v1.zip › elife_poa_e31507_Figure_4_figure_supplement_7.pdf]

## Monkey D

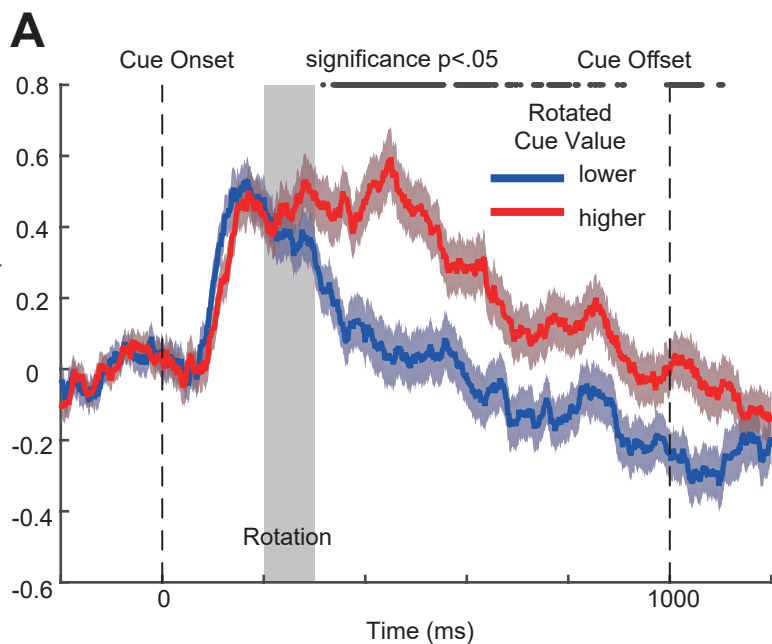

## Monkey G

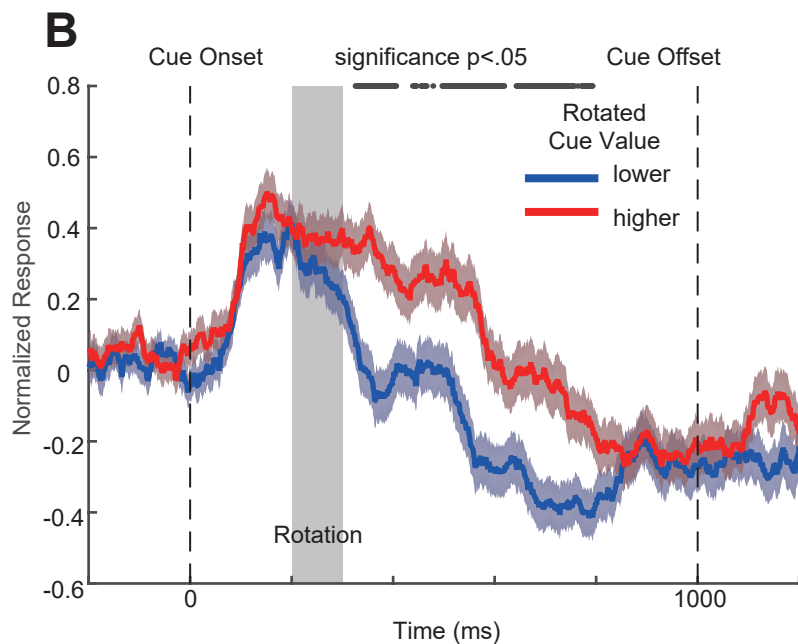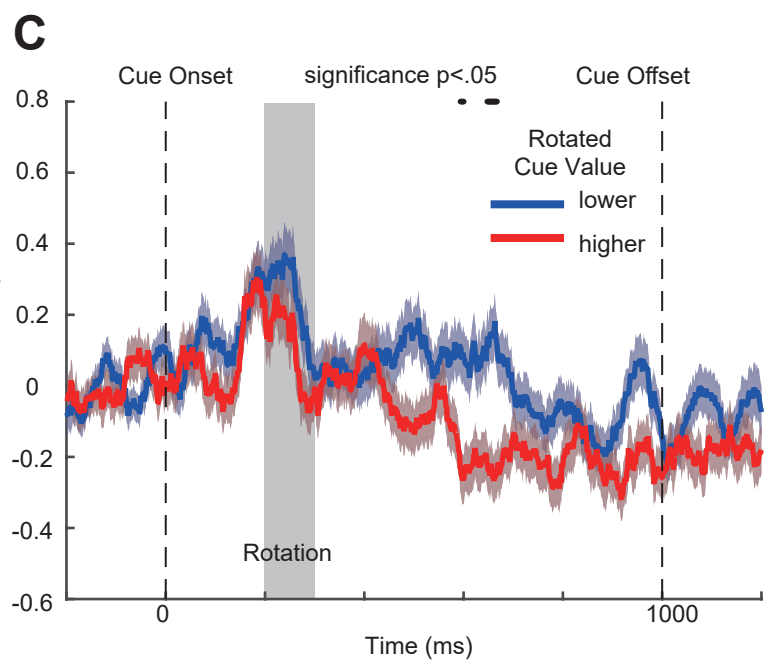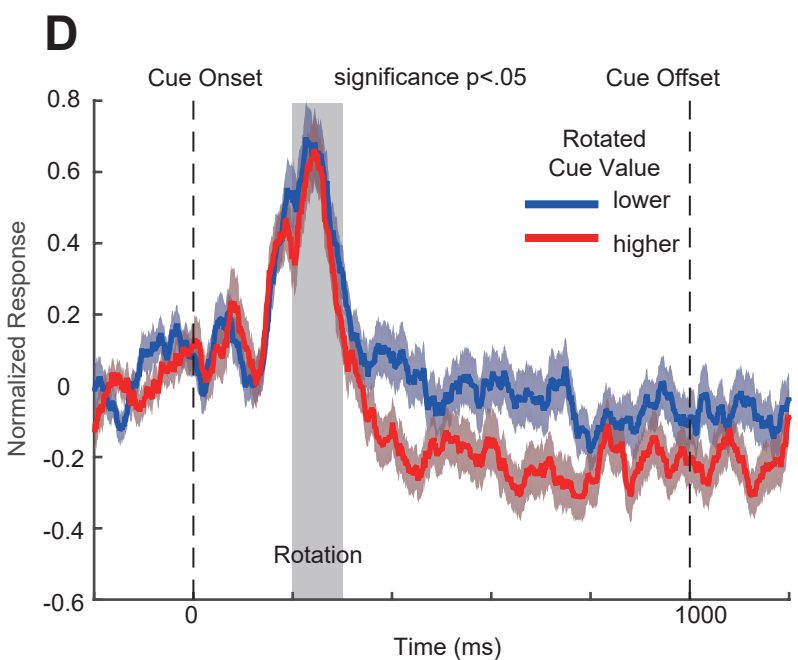

Supplement: supp [file elife-31507-supp-v1.zip › elife_poa_e31507_Figure_4_figure_supplement_6.pdf]

Figure 4 supplement 5

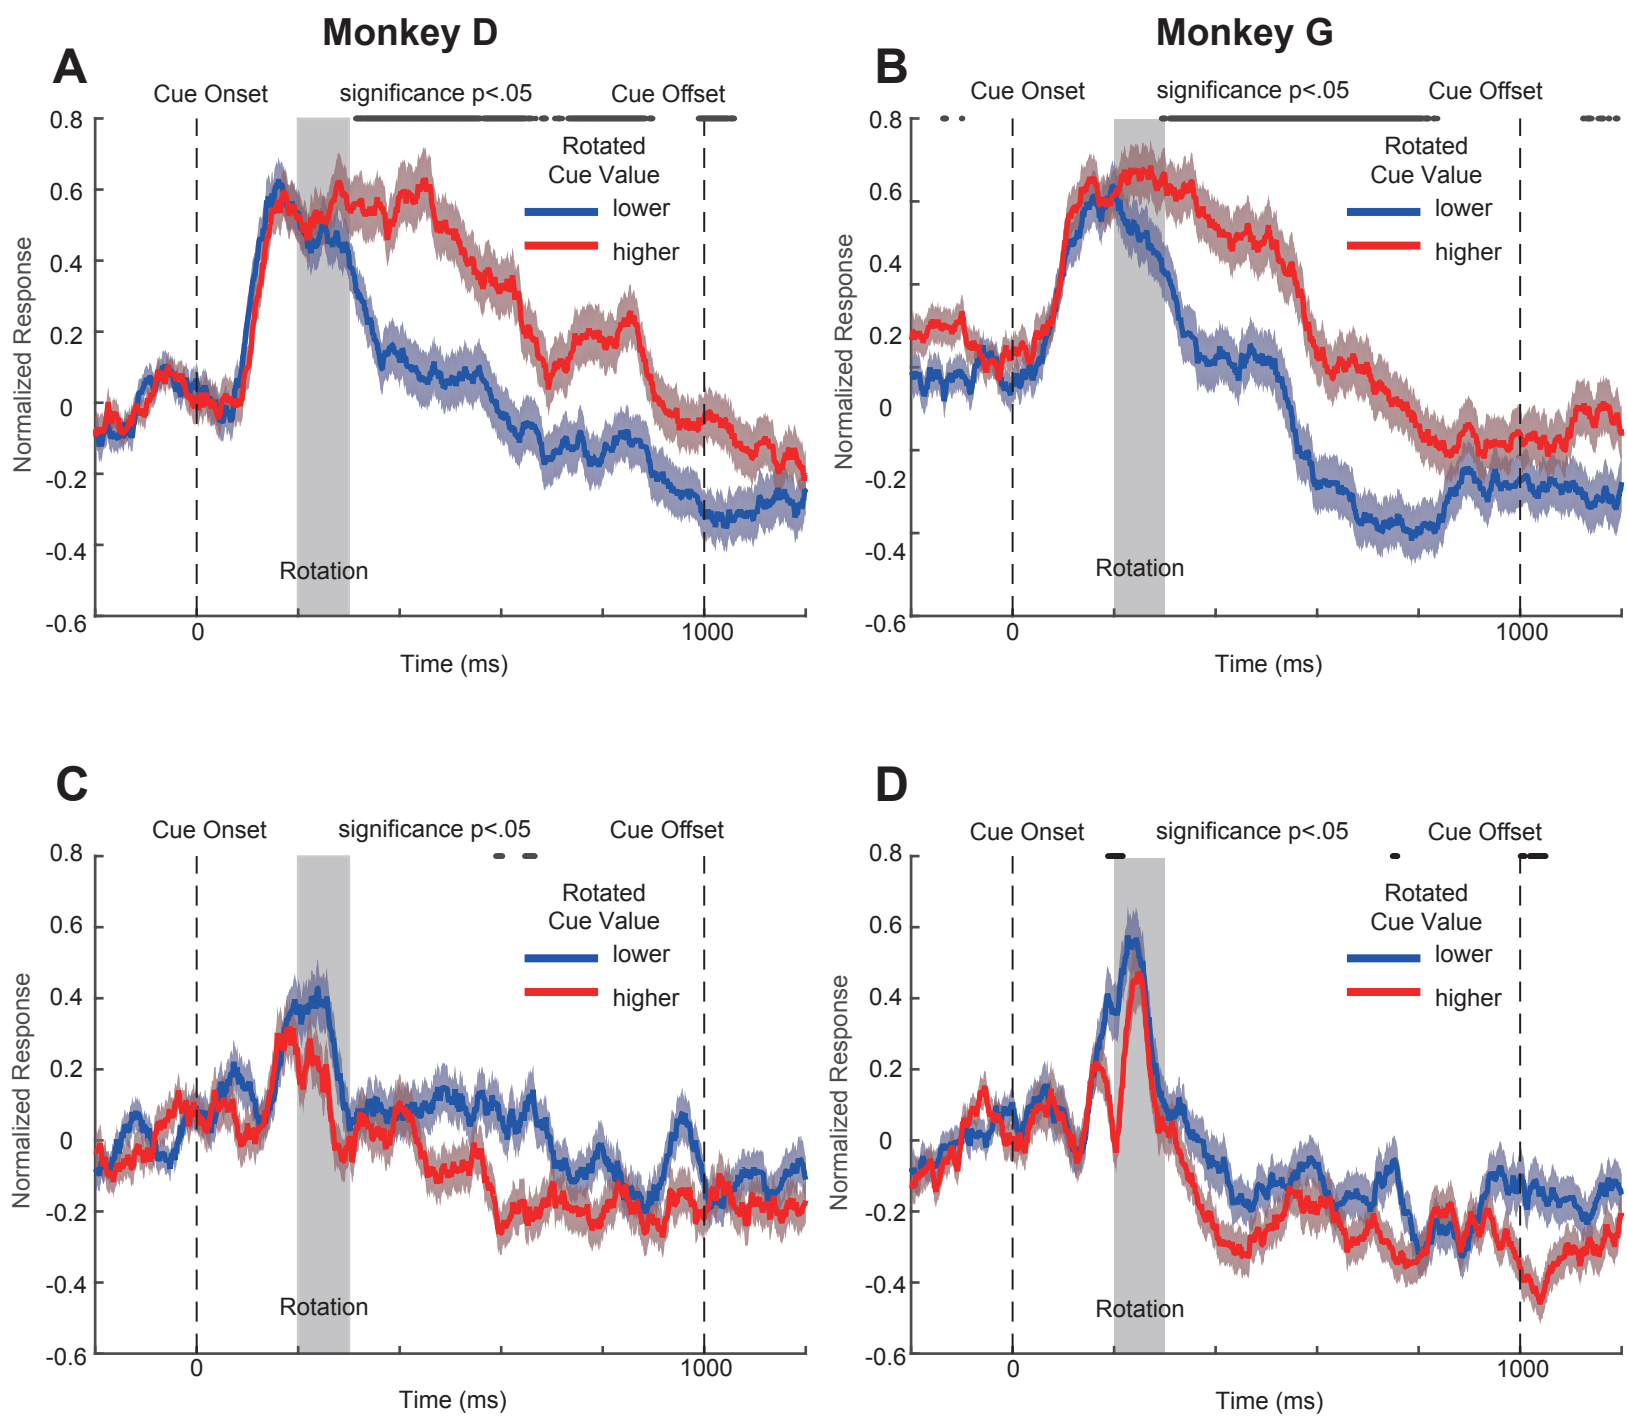

Supplement: supp [file elife-31507-supp-v1.zip › elife_poa_e31507_Figure_4_figure_supplement_5.pdf]

**A.**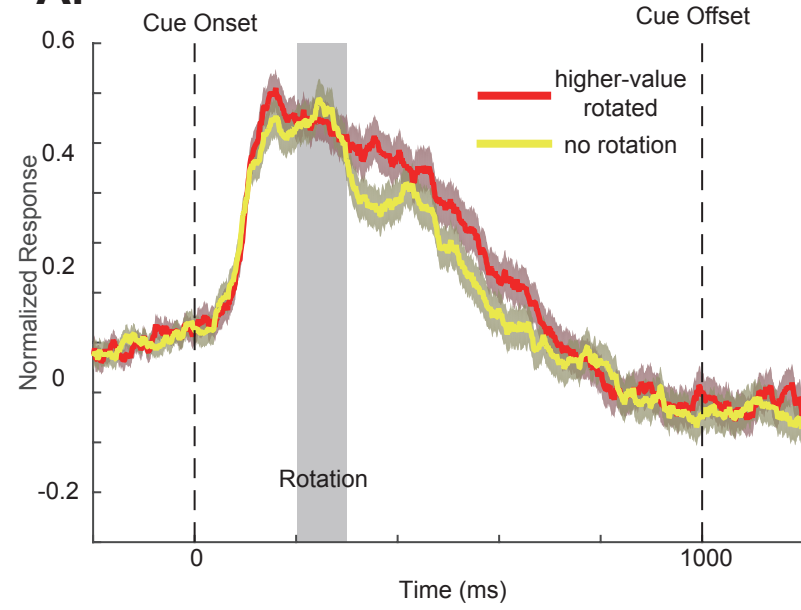**B.**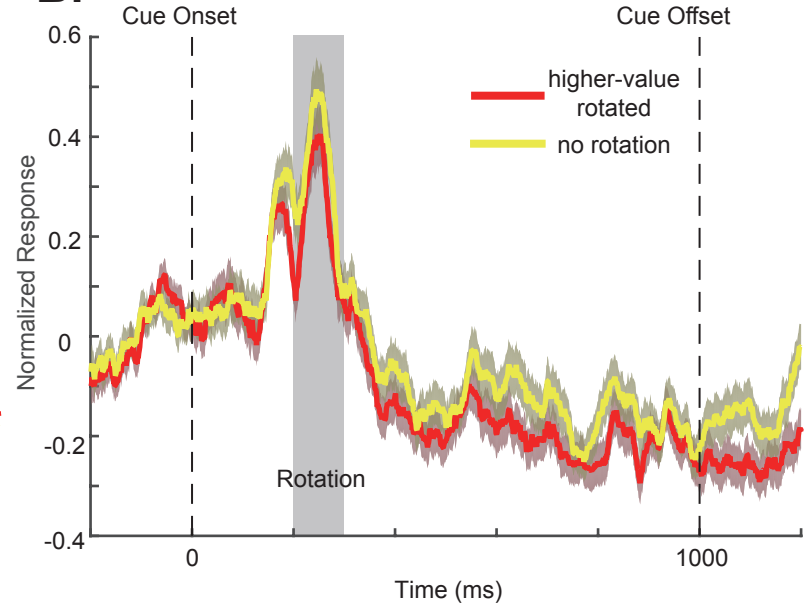

Supplement: supp [file elife-31507-supp-v1.zip › elife_poa_e31507_Figure_4_figure_supplement_3.pdf]

Figure 5 supplement 2

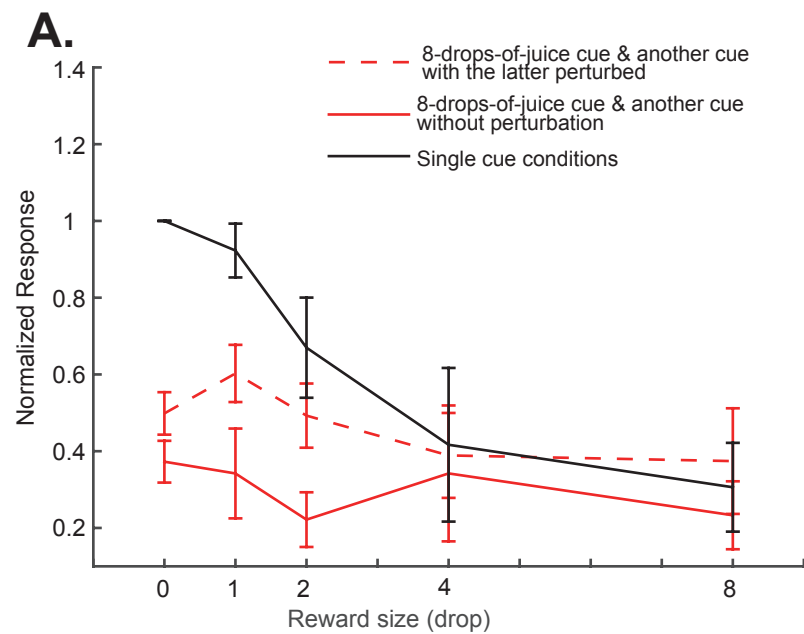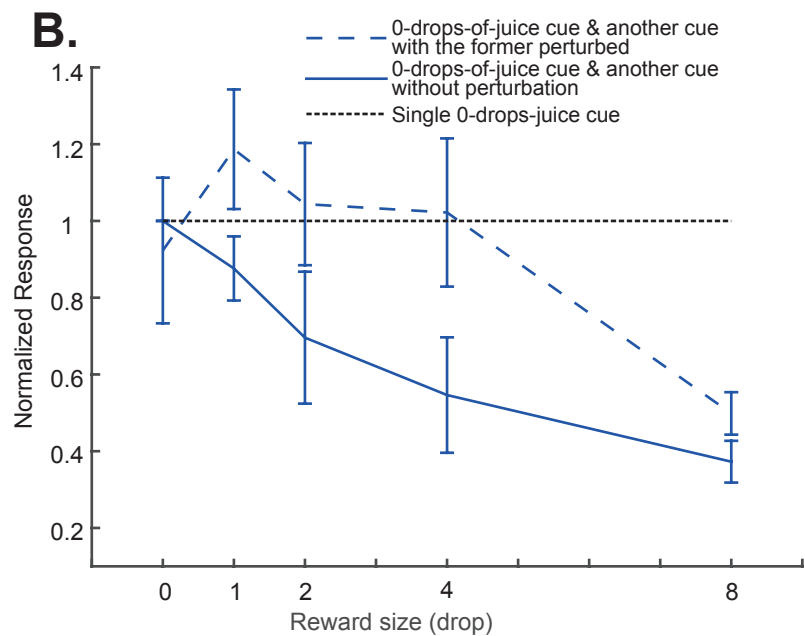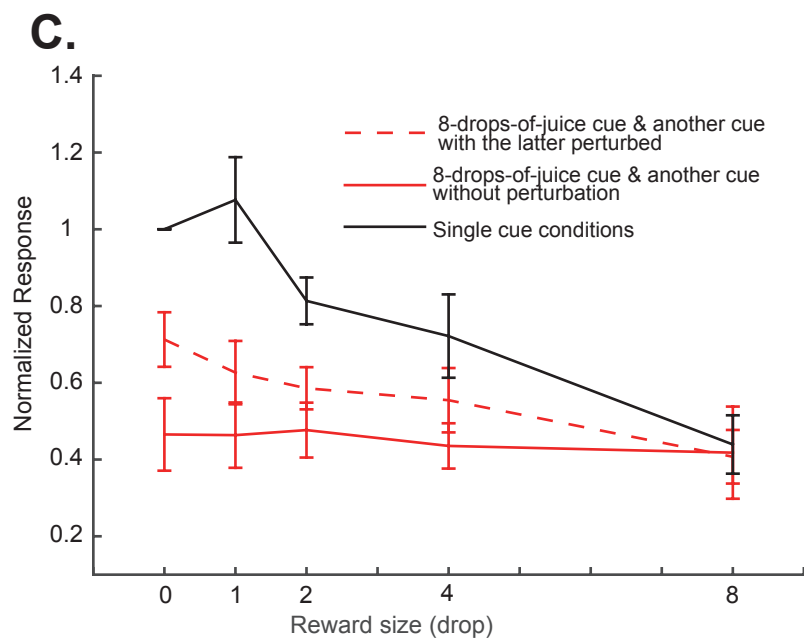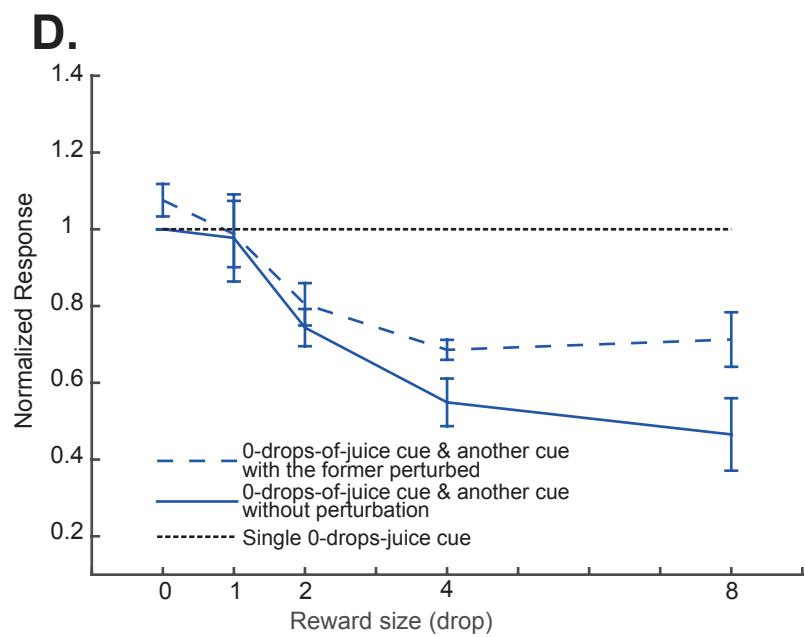

Supplement: supp [file elife-31507-supp-v1.zip › elife_poa_e31507_Figure_5_figure_supplement_2.pdf]

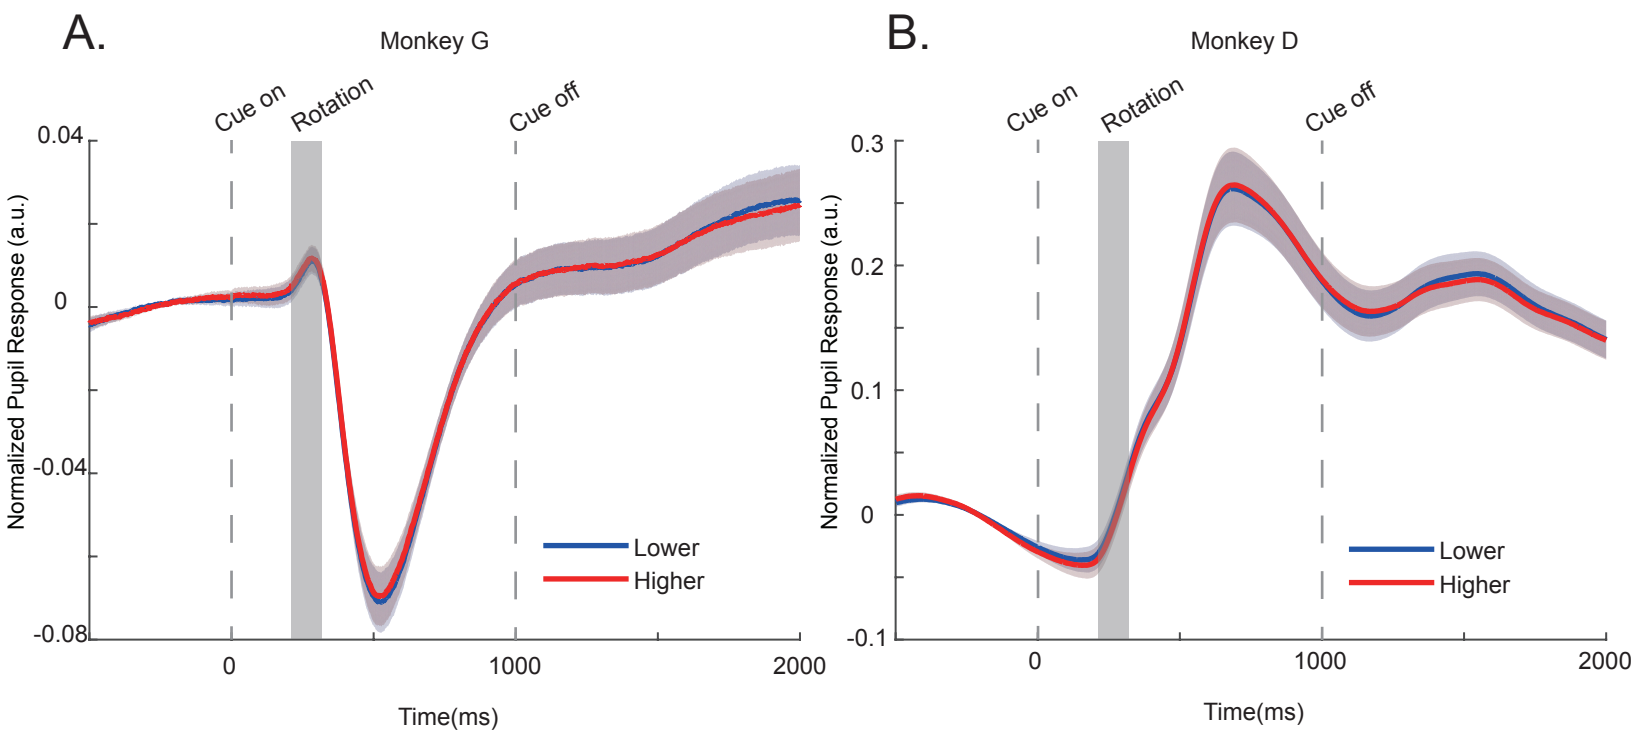

Supplement: supp [file elife-31507-supp-v1.zip › elife_poa_e31507_Figure_2_figure_supplement_2.pdf]

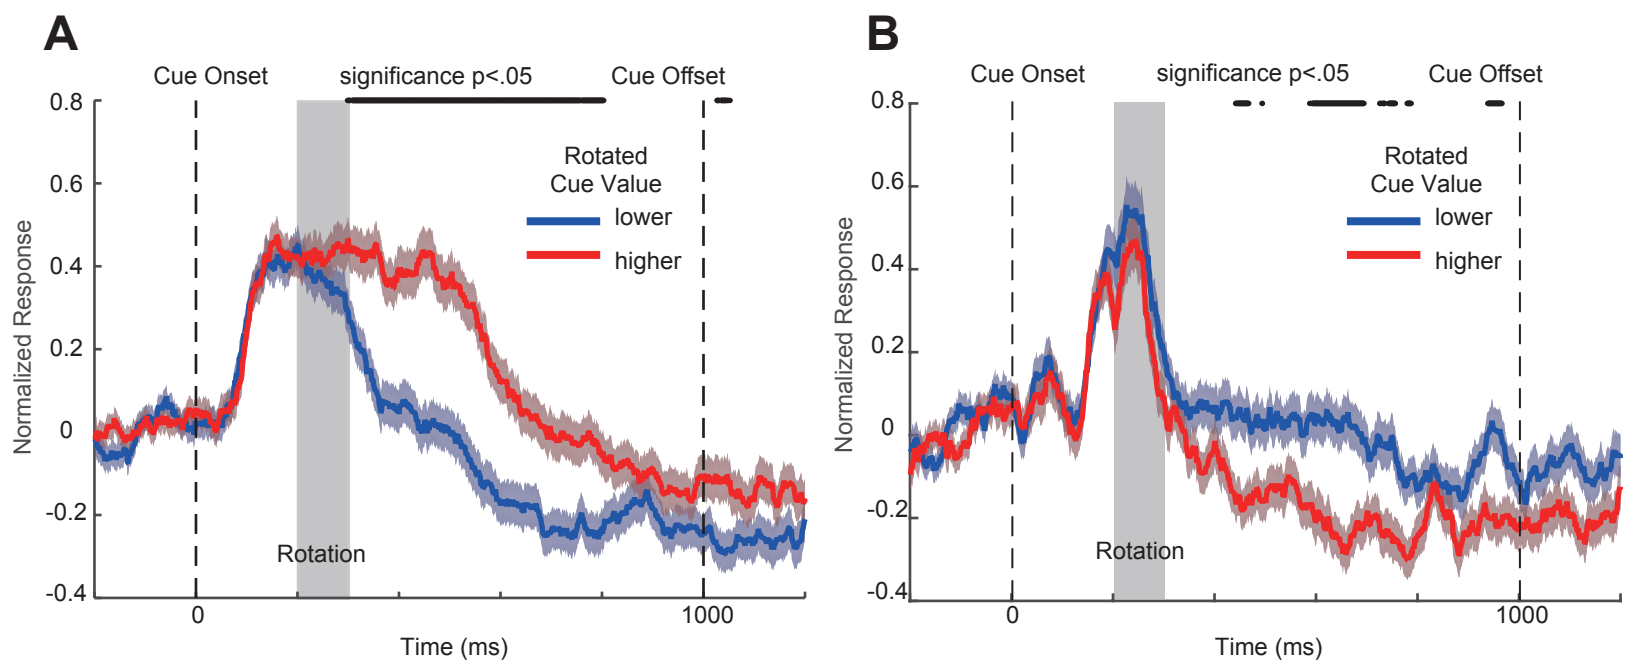

Supplement: supp [file elife-31507-supp-v1.zip › elife_poa_e31507_Figure_4_figure_supplement_4.pdf]

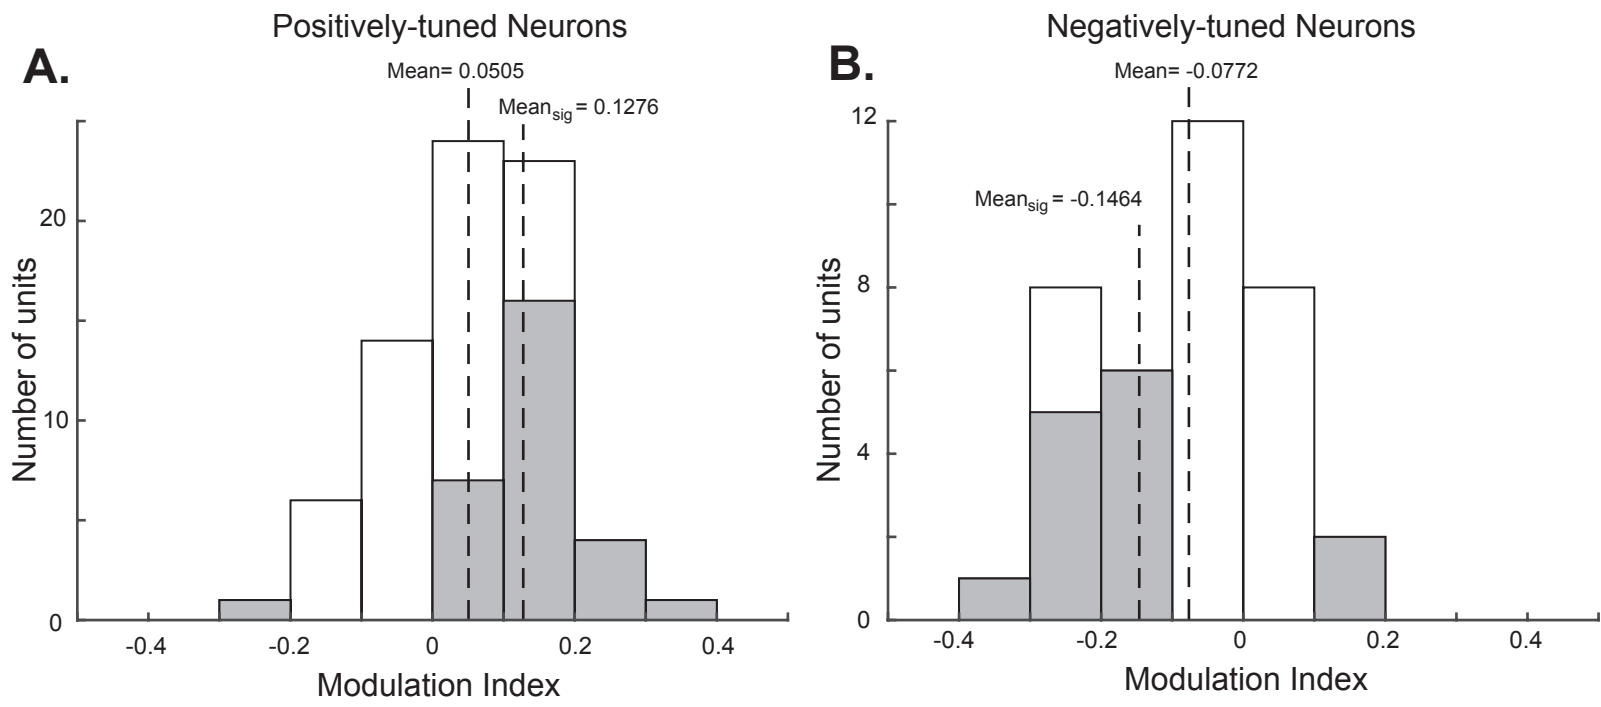

Supplement: supp [file elife-31507-supp-v1.zip › elife_poa_e31507_Figure_4_figure_supplement_2.pdf]

**A.**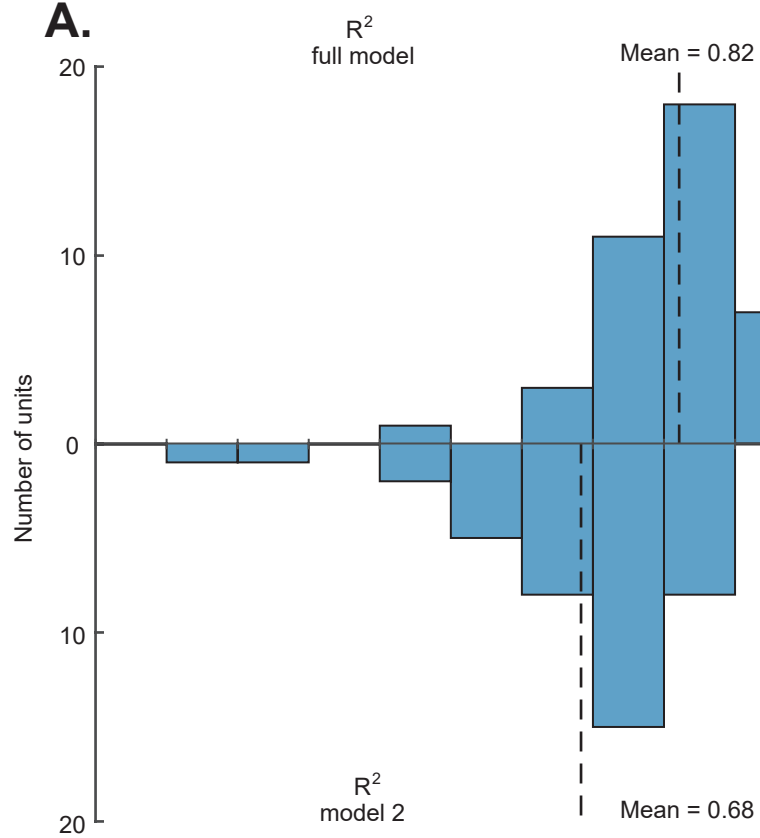**B.**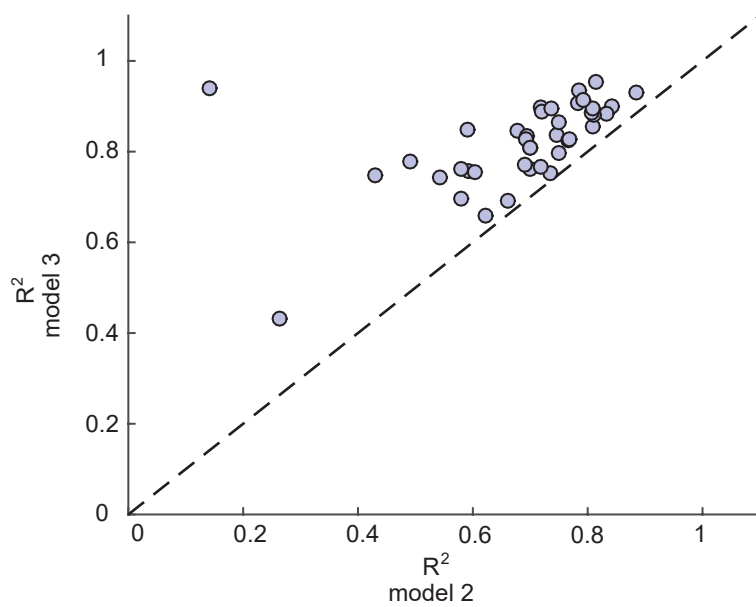

Supplement: supp [file elife-31507-supp-v1.zip › elife_poa_e31507_Figure_5_figure_supplement_4.pdf]

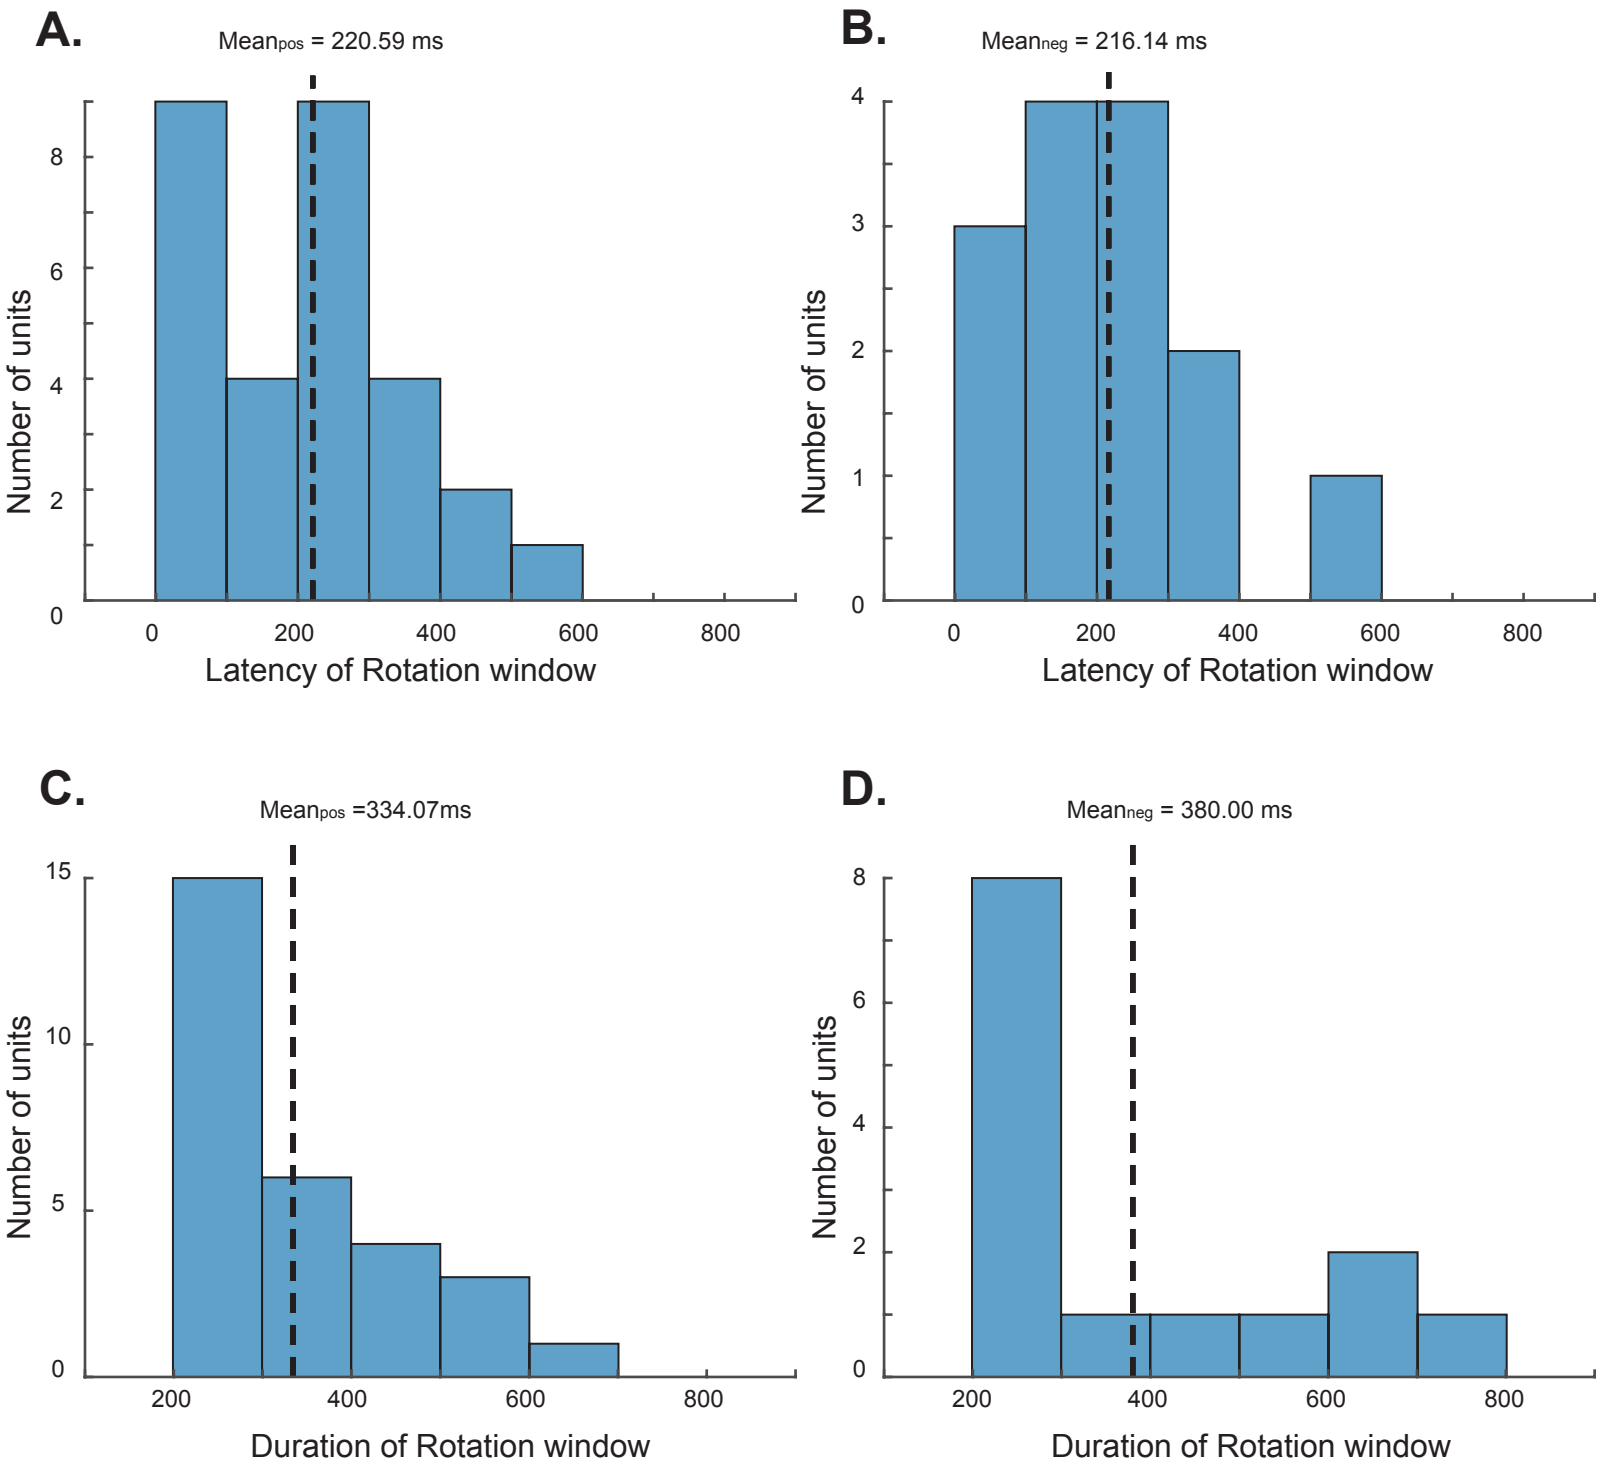

Supplement: supp [file elife-31507-supp-v1.zip › elife_poa_e31507_Figure_4_figure_supplement_1.pdf]

**A.**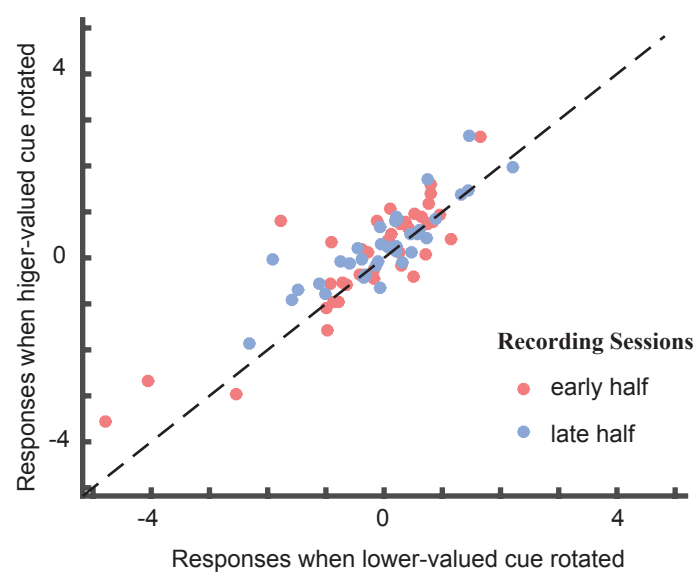**B.**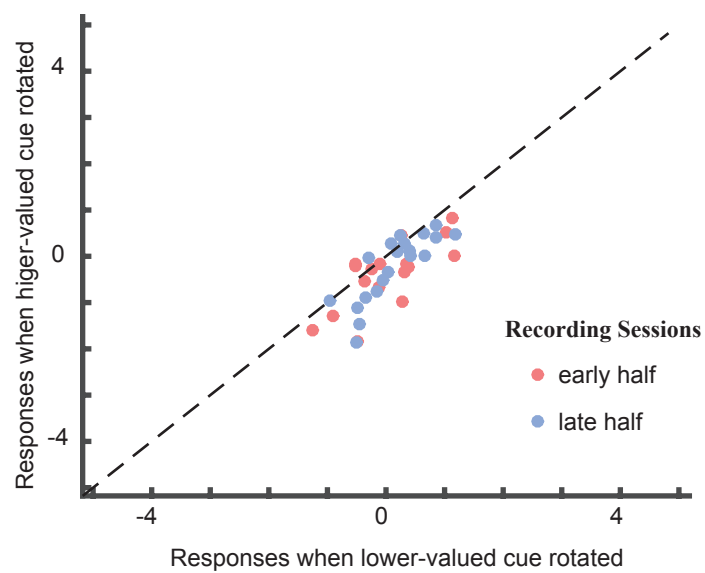

Supplement: supp [file elife-31507-supp-v1.zip › elife_poa_e31507_Figure_4_figure_supplement_8.pdf]

Figure 5 supplement 1

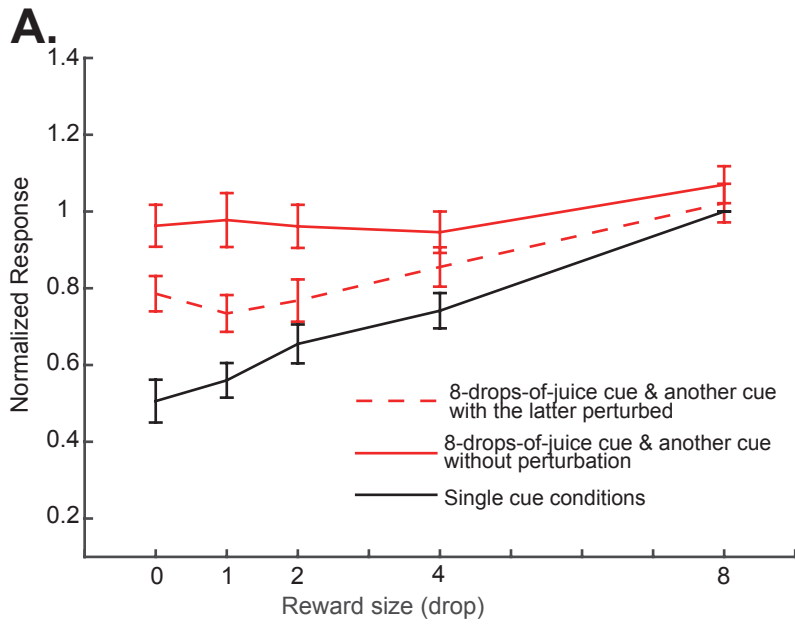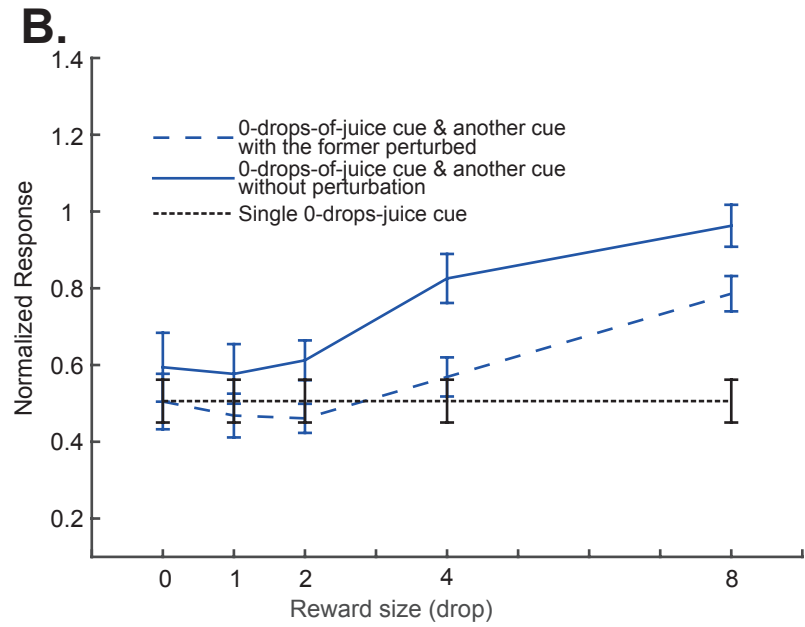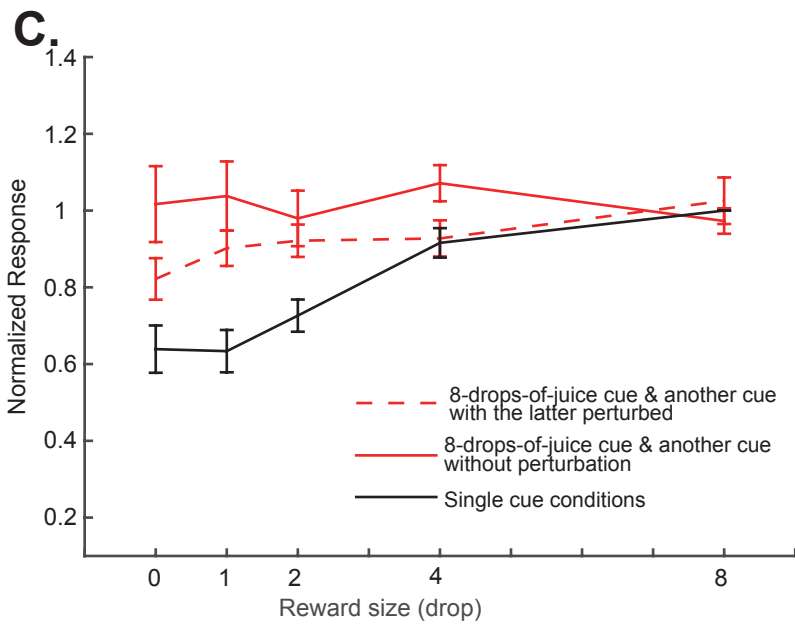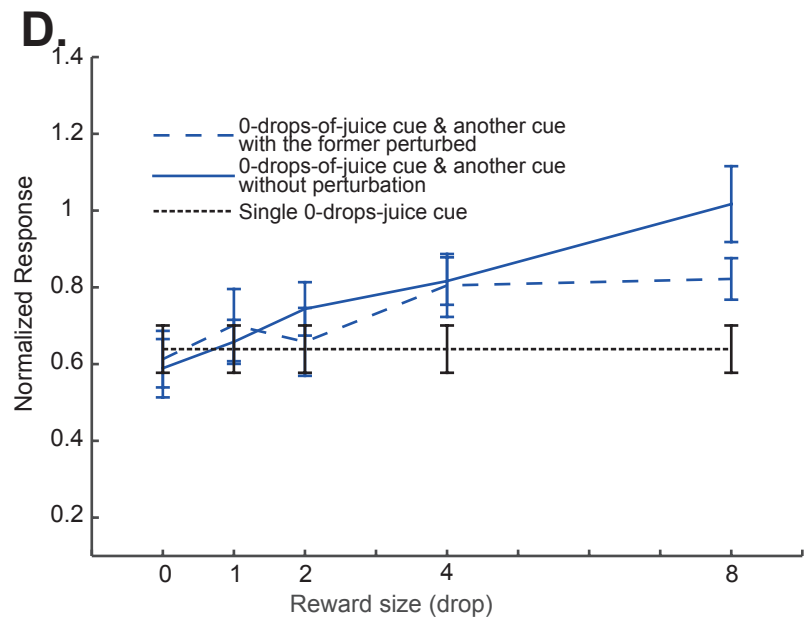

Supplement: supp [file elife-31507-supp-v1.zip › elife_poa_e31507_Figure_5_figure_supplement_1.pdf]
